# Supplementary material for: Hierarchical porous carbons with layer-by-layer motif architectures from confined soft-template self-assembly in layered materials
Source: PubMed Central journal article supplement (PMC5472787; doi:10.1038/ncomms15717), 2017-06-12
Supplement: ncomms15717-s1.pdf [file ncomms15717-s1.pdf]

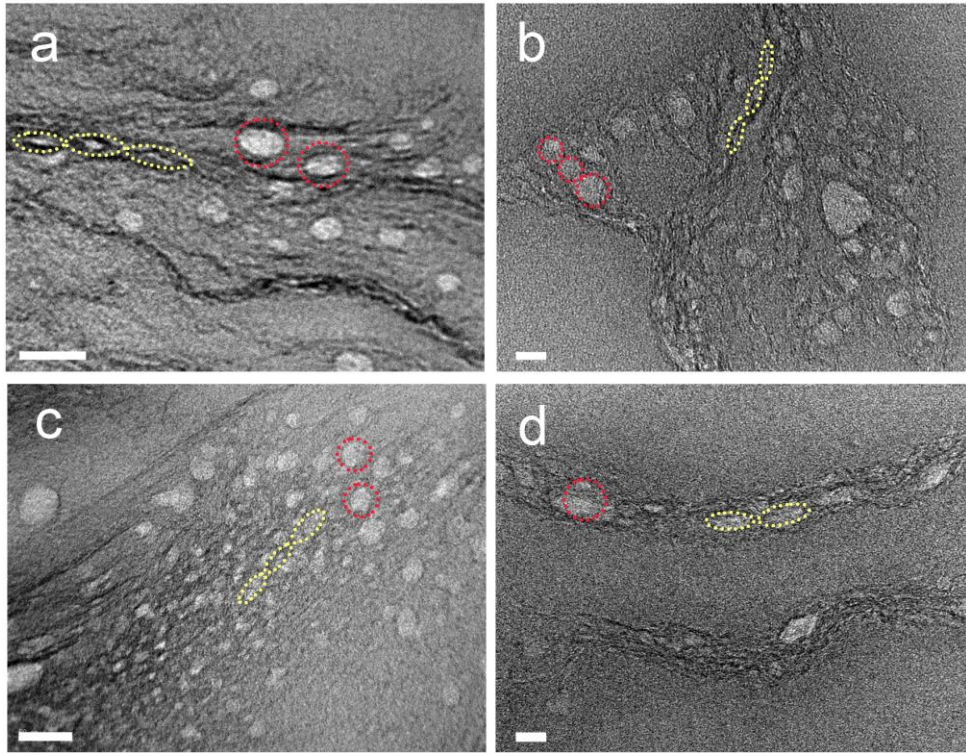

**Supplementary Figure 1.** (a-d) Cross-section TEM images of the MDC-OMC. Scale bars are 50 nm for a, c and 20 nm for b, d.

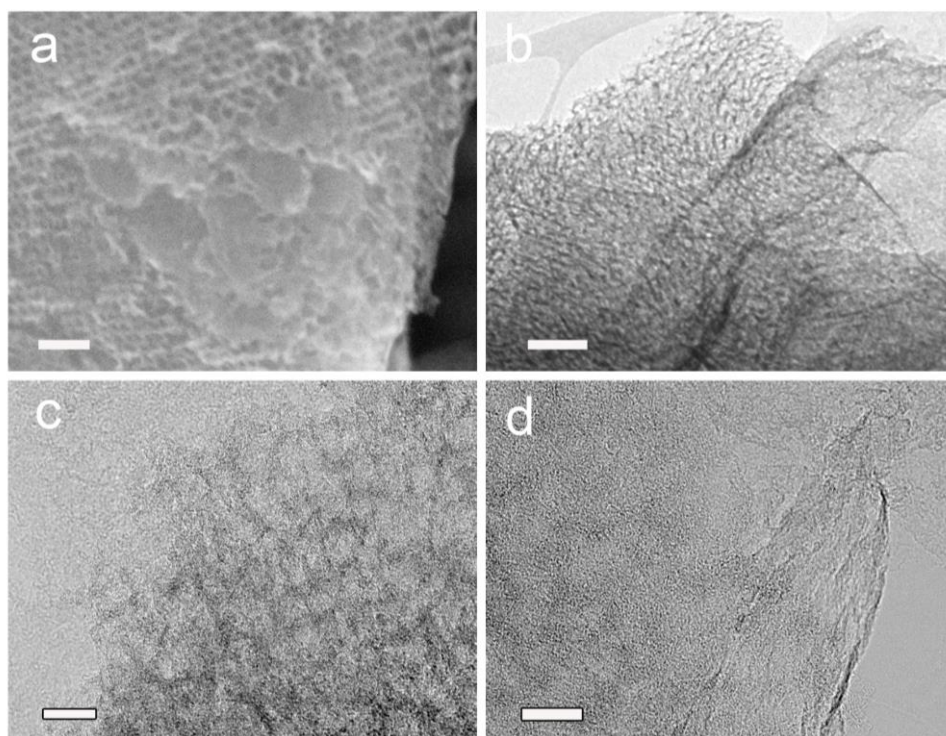

**Supplementary Figure 2.** (a) Top-view SEM and (b-d) TEM images of the MDC-OMC. Scale bars are 50 nm for a, 100 nm for b and 20 nm for c, d.

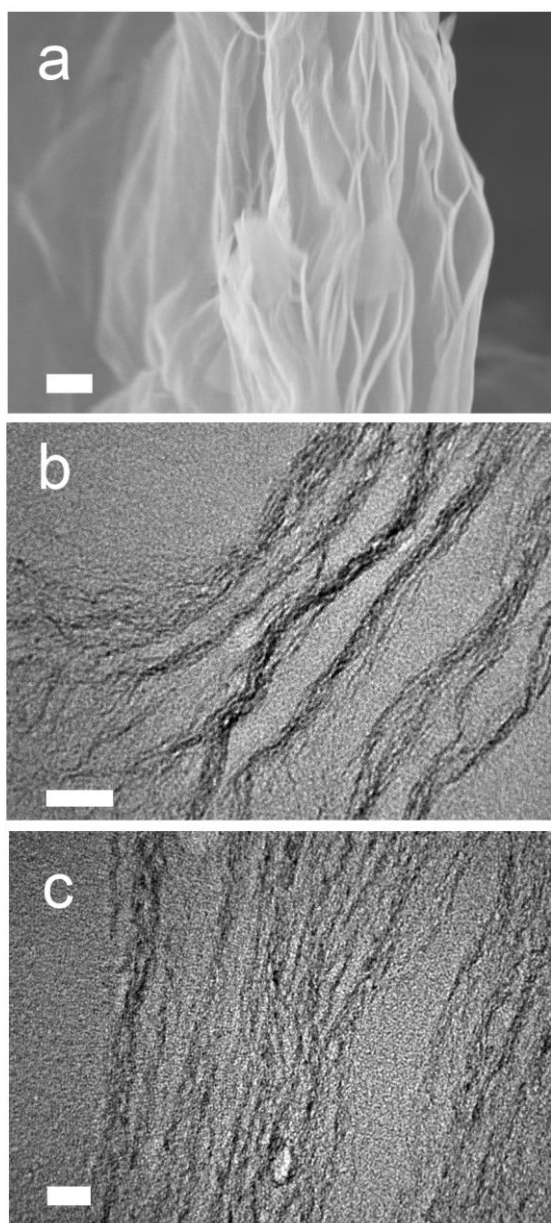

**Supplementary Figure 3.** (a) Cross-section SEM image of the MDC. (b-c) Cross-section TEM images of MDC. Scale bars are 100 nm for a, 50 nm for b and 20 nm for c.

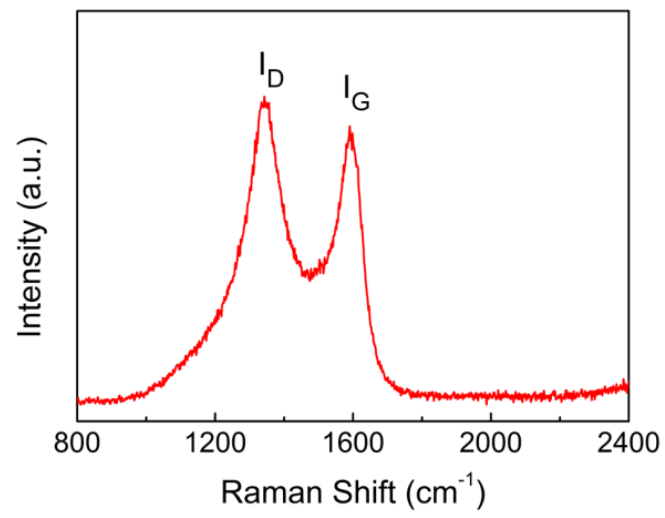

**Supplementary Figure 4.** Raman spectrum of the MDC-OMC.

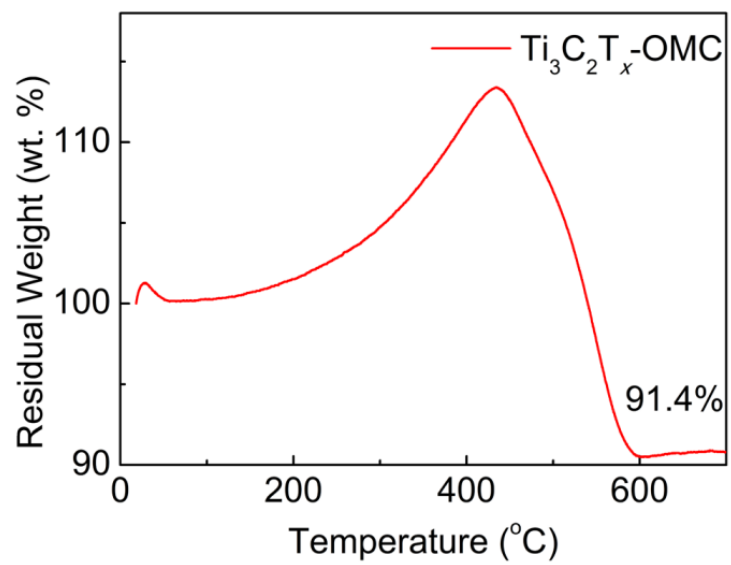

**Supplementary Figure 5.** TG curve of the  $\text{Ti}_3\text{C}_2\text{T}_x\text{-OMC}$  in air.

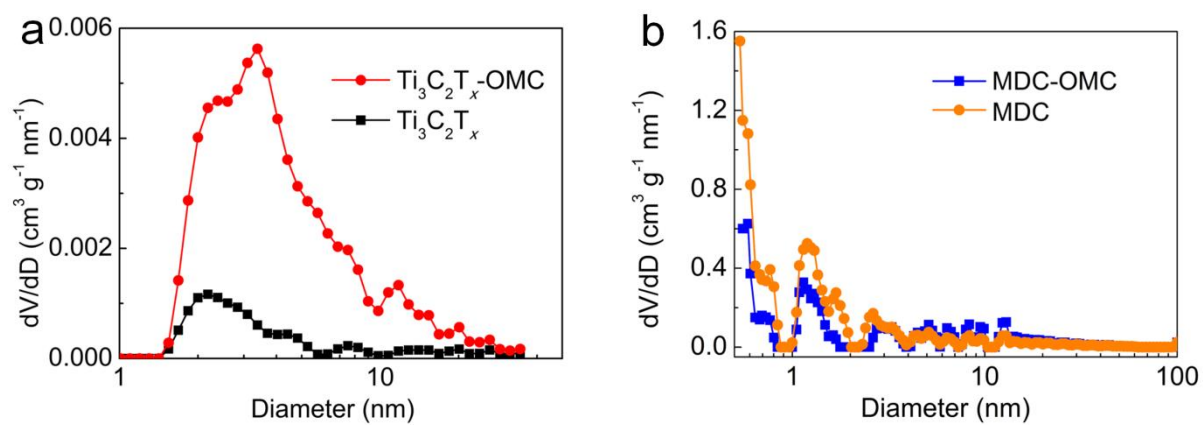

**Supplementary Figure 6.** Pore size distribution curves of (a) the  $\text{Ti}_3\text{C}_2\text{T}_x$  and  $\text{Ti}_3\text{C}_2\text{T}_x$ -OMC and (b) the MDC and MDC-OMC.

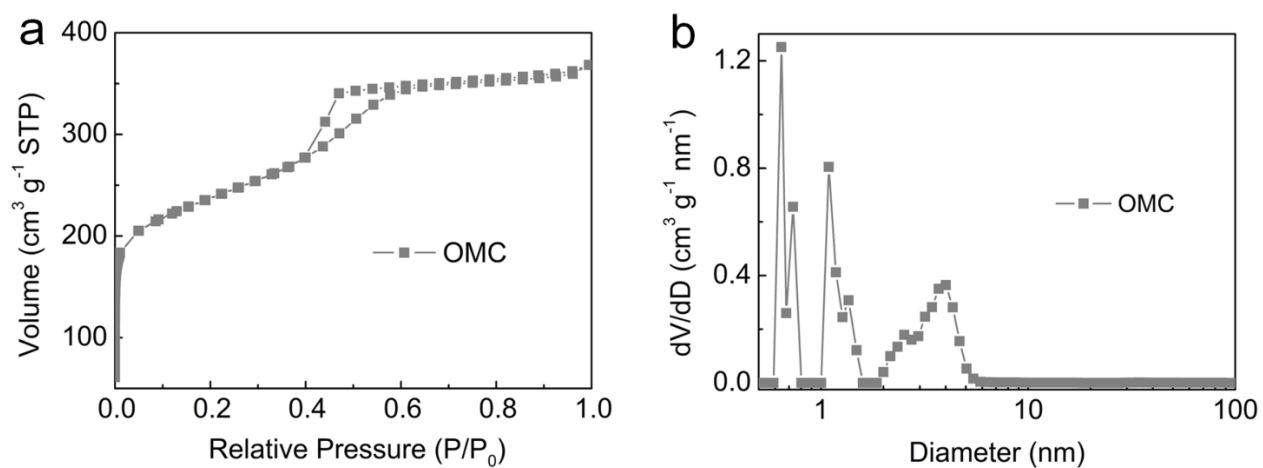

**Supplementary Figure 7.** (a) Nitrogen adsorption-desorption isotherms of the OMC and (b) corresponding pore size distribution curve.

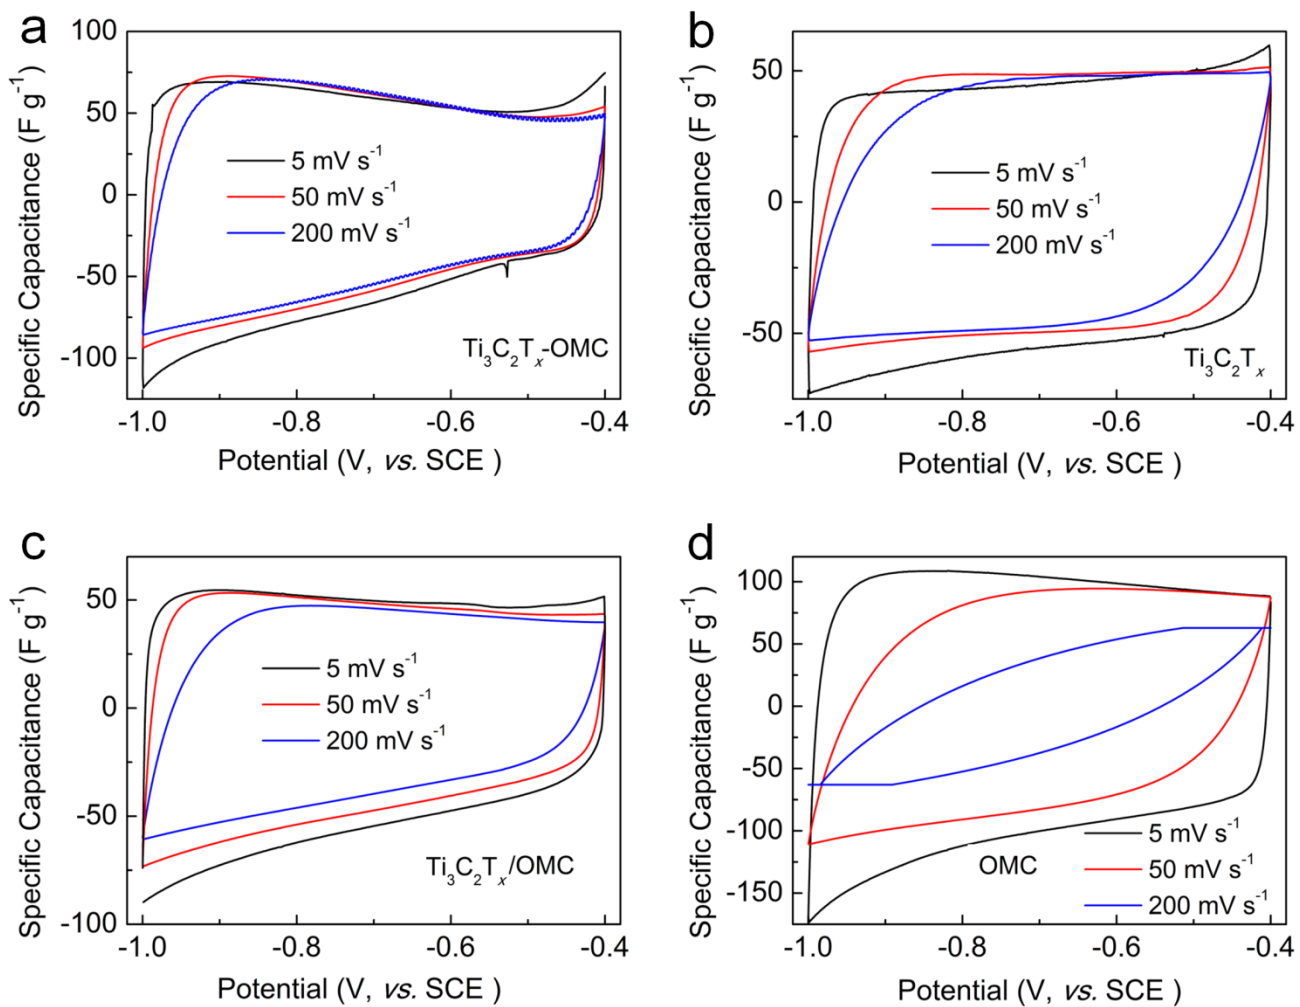

**Supplementary Figure 8.** CV curves of (a) the Ti<sub>3</sub>C<sub>2</sub>T<sub>x</sub>-OMC, (b) Ti<sub>3</sub>C<sub>2</sub>T<sub>x</sub>, (c) Ti<sub>3</sub>C<sub>2</sub>T<sub>x</sub>/OMC mixture, and (d) OMC at various scan rates in 6 M KOH electrolyte using a three-electrode system.



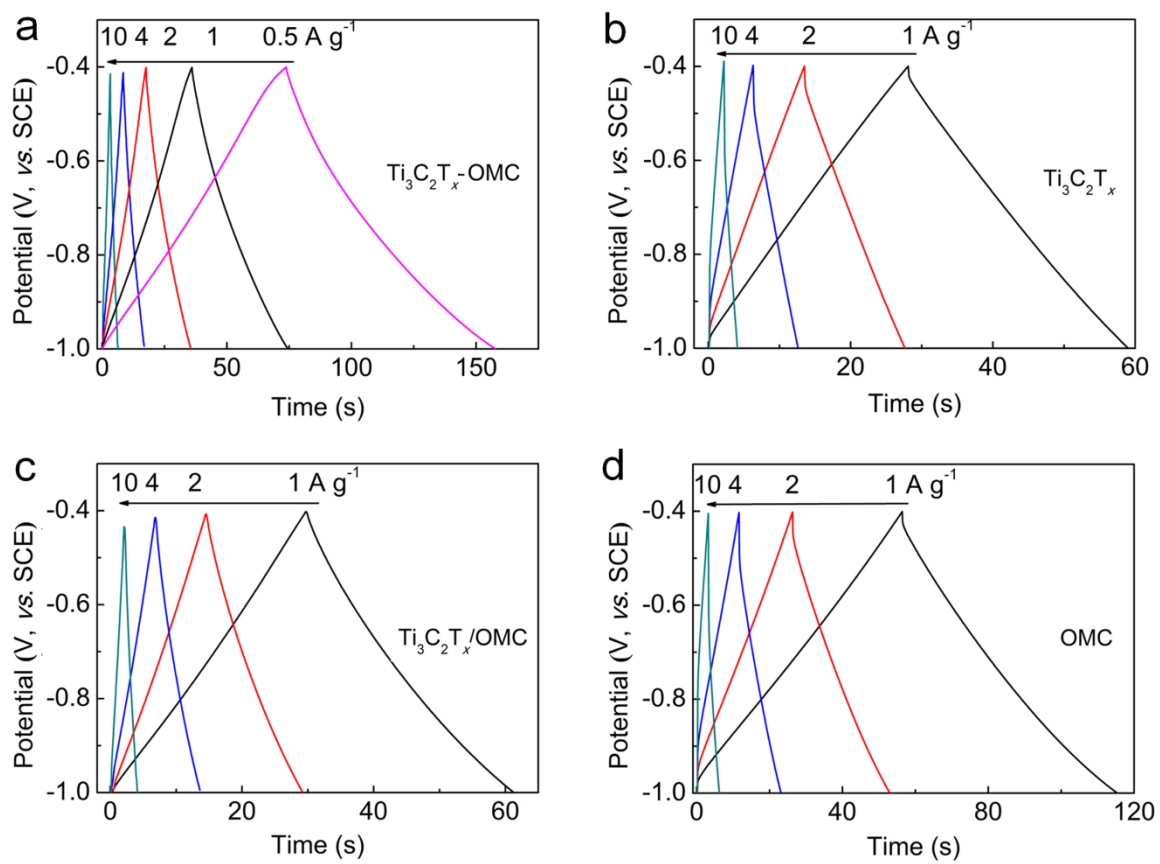

**Supplementary Figure 9.** GCD curves of (a) the Ti<sub>3</sub>C<sub>2</sub>T<sub>x</sub>-OMC, (b) Ti<sub>3</sub>C<sub>2</sub>T<sub>x</sub>, (c) Ti<sub>3</sub>C<sub>2</sub>T<sub>x</sub>/OMC mixture, and (d) OMC at various current densities in 6 M KOH electrolyte using a three-electrode system.

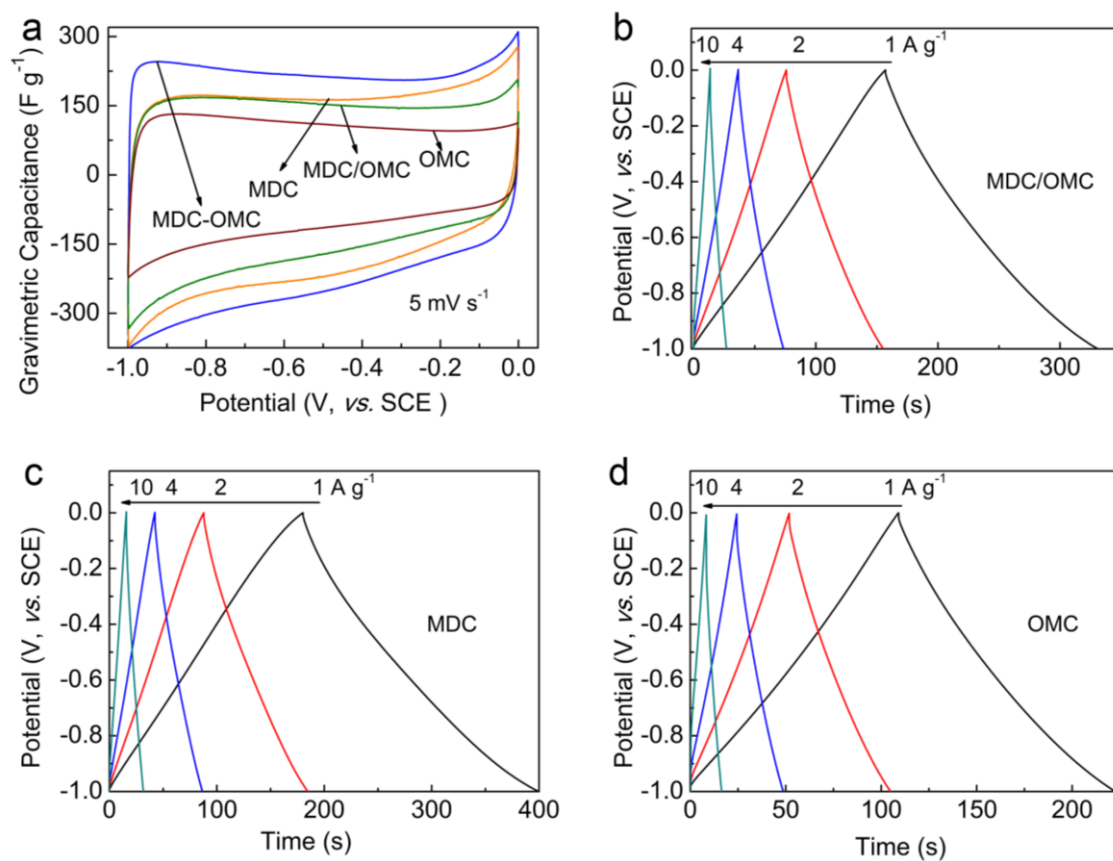

**Supplementary Figure 10.** (a) CV curves of the MDC-OMC, MDC/OMC mixture, MDC, and OMC at a scan rate of  $5 \text{ mV s}^{-1}$ . GCD curves of (b) the MDC/OMC mixture, (c) MDC, and (d) OMC at various current densities in 6 M KOH electrolyte using a three-electrode system.

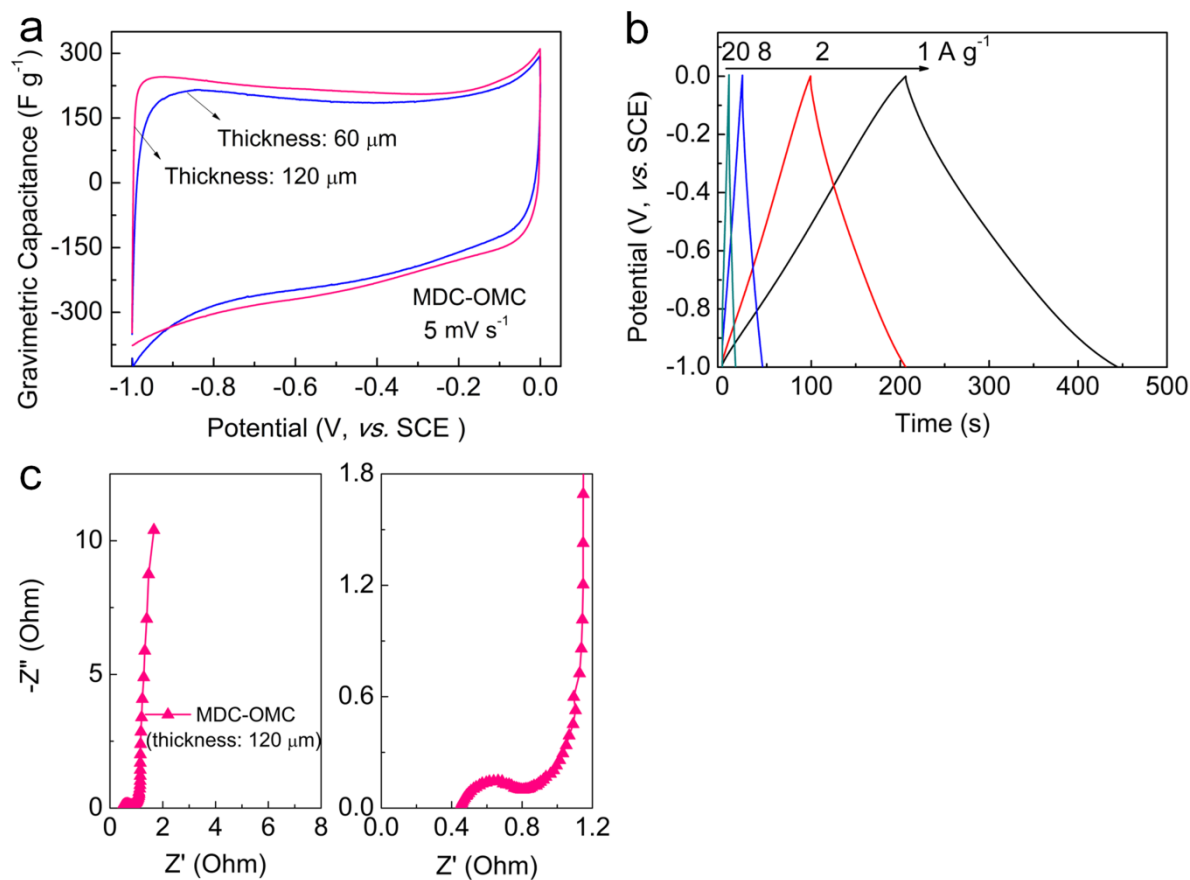

**Supplementary Figure 11.** (a) CV curves of the MDC-OMC electrodes with different thicknesses. (b) GCD curves of the MDC-OMC electrode with a thickness of 120  $\mu m$ . (c) Nyquist plots of the MDC-OMC electrode of 120  $\mu m$  thickness with the close-up view of the high-frequency regime.

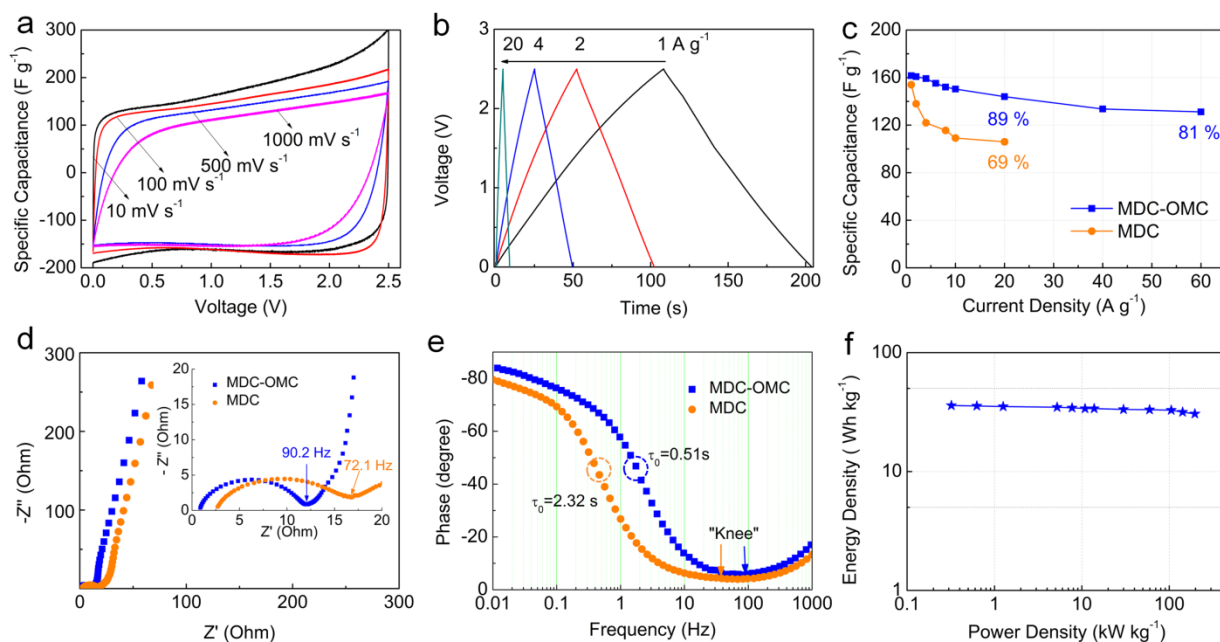

**Supplementary Figure 12.** Electrochemical performance of the MDC-OMC and MDC in 1 M TEA BF<sub>4</sub> in AN. (a) CV curves of the MDC-OMC at scan rates of 10, 100, 500 and 1000 mV s<sup>-1</sup>. (b) Galvanostatic charge/discharge curves of the MDC-OMC at current densities of 1, 2, 4 and 20 A g<sup>-1</sup>. (c) Comparison of specific capacitances vs. various current densities for the MDC-OMC and MDC. (d) Nyquist plots of the MDC-OMC and MDC. Inset magnifies the high-frequency regime. (e) Bode plots of phase angle vs. frequency for the MDC-OMC and MDC. (f) Ragone plots showing energy density and power density of the MDC-OMC supercapacitor.

**Supplementary Table 1.** Summary of the specific surface area (SSA), pore volume (PV), electrical conductivity for  $\text{Ti}_3\text{C}_2\text{T}_x\text{-OMC}$ ,  $\text{Ti}_3\text{C}_2\text{T}_x/\text{OMC}$  mixture,  $\text{Ti}_3\text{C}_2\text{T}_x$ , MDC, OMC, MDC-OMC, and MDC/OMC mixture samples. The densities of corresponding electrodes are also reported.

| Sample                                       | BET<br>SSA/<br>$\text{m}^2 \text{g}^{-1}$ | Micro-<br>SSA/<br>$\text{m}^2 \text{g}^{-1}$ | Ratio of<br>Micro-<br>SSA/BET<br>SSA | Total PV/<br>$\text{cm}^3 \text{g}^{-1}$ | Micro-<br>PV/<br>$\text{cm}^3 \text{g}^{-1}$ | Ratio of<br>micro-P<br>V/Total<br>PV | Condu<br>ctivity/<br>$\text{S cm}^{-1}$ | Density<br>/ $\text{g cm}^{-3}$ |
|----------------------------------------------|-------------------------------------------|----------------------------------------------|--------------------------------------|------------------------------------------|----------------------------------------------|--------------------------------------|-----------------------------------------|---------------------------------|
| $\text{Ti}_3\text{C}_2\text{T}_x$            | 13                                        | 1.1                                          | 9%                                   | 0.05                                     | 0                                            | 0%                                   | 168                                     | 3.4                             |
| $\text{Ti}_3\text{C}_2\text{T}_x\text{-OMC}$ | 84                                        | 18                                           | 22%                                  | 0.19                                     | 0.02                                         | 11%                                  | 187                                     | 3.1                             |
| $\text{Ti}_3\text{C}_2\text{T}_x/\text{OMC}$ | 92                                        | 43                                           | 47%                                  | 0.05                                     | 0.035                                        | 70%                                  | 124                                     | 2.4                             |
| MDC                                          | 1536                                      | 894                                          | 58%                                  | 1.23                                     | 0.39                                         | 32%                                  | 67                                      | 0.52                            |
| OMC                                          | 779                                       | 379                                          | 49%                                  | 0.57                                     | 0.28                                         | 49%                                  | 8                                       | 0.61                            |
| MDC-OMC                                      | 1021                                      | 367                                          | 36%                                  | 1.62                                     | 0.16                                         | 10%                                  | 81                                      | 0.83                            |
| MDC/OMC                                      | 1080                                      | 600                                          | 56%                                  | 0.80                                     | 0.42                                         | 53%                                  | 44                                      | 0.54                            |

**Supplementary Table 2.** Summary of the supercapacitive performance of representative porous carbon electrodes.

| Name of typical material           | Scan rate/<br>Current density | $C_g$ /<br>$F g^{-1}$ | $C_v$ /<br>$F cm^{-3}$ | Electrolyte            | Ref  |
|------------------------------------|-------------------------------|-----------------------|------------------------|------------------------|------|
| Commercial activated carbon        | -                             | 160-200               | 80-110                 | 6M KOH                 | 1    |
| Charcoal-derived porous carbon     | 1 A $g^{-1}$<br>10 A $g^{-1}$ | 186<br>168 (90%)      | 106<br>96              | 1M<br>TEA $BF_4/AN$    | 2    |
| MOF-derived carbon nanorods        | 0.05 A $g^{-1}$               | 198                   | -                      | 1M $H_2SO_4$           | 3    |
| Porous carbon nanosheets           | 0.5 A $g^{-1}$                | 257                   | -                      | 6M KOH                 | 4    |
| Porous carbon film                 | 10 mV $s^{-1}$                | 240                   | 220                    | 0.5M $H_2SO_4$         | 5    |
| Reduced graphene oxide (RGO) paper | 0.5 A $g^{-1}$                | 208                   | 196                    | 6M KOH                 | 6    |
| EM-CCG film                        | 0.1 A $g^{-1}$                | 191.7                 | 255.5                  | 1M $H_2SO_4$           | 7    |
| Compact RGO film                   | 5 mV $s^{-1}$                 | 185                   | 226                    | 6M KOH                 | 8    |
| Graphene/OMC                       | 0.5 A $g^{-1}$                | 197                   | -                      | 6M KOH                 | 9    |
| Graphene/CNT films                 | 50 mV $s^{-1}$                | 175                   | 160                    | 0.5M $H_2SO_4$         | 10   |
| Graphene oxide and nanodiamond     | 0.2 A $g^{-1}$                | 143                   | -                      | 1M $H_2SO_4$           | 11   |
| Carbide derived carbon (CDC) film  | 20 mV $s^{-1}$                | -                     | 160                    | 1M $H_2SO_4$           | 12   |
| Graphene-like CDC                  | 20 mV $s^{-1}$                | 80                    | -                      | 1.5 M<br>TEA $BF_4/AN$ | 13   |
| MDC                                | 1 A $g^{-1}$                  | 222                   | -                      | 6M KOH                 | 14   |
| MAX derived carbon                 | 0.5 A $g^{-1}$                | 160                   | -                      | 6M KOH                 | 14   |
| $Ti_3C_2T_x$ -OMC                  | 0.5 A $g^{-1}$                | 67                    | 208                    | 6M KOH                 | This |

|         |                         |           |     |                         |      |
|---------|-------------------------|-----------|-----|-------------------------|------|
|         | $5 \text{ mV s}^{-1}$   | 65        | 202 |                         | work |
| MDC-OMC | $0.5 \text{ A g}^{-1}$  | 255       | 212 | 6M KOH                  |      |
|         | $10 \text{ A g}^{-1}$   | 217 (85%) | 180 |                         | This |
|         | $5 \text{ mV s}^{-1}$   | 234       | 194 |                         | work |
|         | $500 \text{ mV s}^{-1}$ | 203 (87%) | 169 |                         |      |
| MDC-OMC | $1 \text{ A g}^{-1}$    | 162       | 135 | 1M                      | This |
|         | $10 \text{ A g}^{-1}$   | 151 (93%) | 125 | TEA BF <sub>4</sub> /AN | work |

### **Supplementary Note 1. Detailed discussion on Raman spectrum.**

There are two distinct vibration bands shown in the Raman spectrum of MDC-OMC (**Supplementary Fig. 4**). The D band ( $1360\text{ cm}^{-1}$ ) generally originates from the vibrations of disordered carbon or the defects in the plane terminations, whereas the G band ( $1590\text{ cm}^{-1}$ ) is related to the vibrations of ordered  $sp^2$ -bonded graphitic carbon sheets. Raman spectrum of MDC-OMC implies the coexistence of disordered carbon and ordered graphitic carbon.

### **Supplementary Note 2. Detailed discussion on ICP and TG analysis.**

As determined by the ICP analysis, the weight percentage of Ti and C in the  $\text{Ti}_3\text{C}_2\text{T}_x$ -OMC is about 56% and  $24.5\pm 0.1\%$ , respectively. It can be reckoned that the weight percentage of  $\text{Ti}_3\text{C}_2\text{T}_x$  is  $\sim 85\%$  and OMC is  $\sim 15\%$ . After chlorination, the percentage of MDC and OMC in the MDC-OMC is about 38.4% and 61.6%, respectively.

We also carried out thermogravimetric analysis (TG) in air to estimate the weight percentage of Ti and C in the  $\text{Ti}_3\text{C}_2\text{T}_x$ -OMC. As shown in **Supplementary Fig. 5**, the Ti starts to be oxidized at  $\sim 100\text{ }^\circ\text{C}$  with a continuous weight increase until  $\sim 435\text{ }^\circ\text{C}$ . When the temperature further increased higher than  $435\text{ }^\circ\text{C}$ , the weight reduced dramatically because of the decomposition of carbon in air. The carbon was burnt out until  $600\text{ }^\circ\text{C}$  and the remaining weight appeared stable. The remaining is  $\text{TiO}_2$  with a weight percentage of 91.4%. It can be reckoned that the percentage of Ti in the original  $\text{Ti}_3\text{C}_2\text{T}_x$ -OMC is  $\sim 55\%$ . The reduced weight percentage above  $400\text{ }^\circ\text{C}$  corresponds to the content of carbon, which is  $\sim 22.8\%$ . These results are consistent with the ICP analysis.



### Supplementary Note 3. Detailed discussion on electrical conductivity of $\text{Ti}_3\text{C}_2\text{T}_x$ , MDC, and MDC-OMC.

The electrical conductivity of  $\text{Ti}_3\text{C}_2\text{T}_x$  ( $168 \text{ S cm}^{-1}$ ) in this work is lower than the previously reported  $\text{Ti}_3\text{C}_2\text{T}_x$  film ( $2.4 \times 10^3 \text{ S cm}^{-1}$ )<sup>15</sup>. This could be attributed to the following two effects: (1) The  $\text{Ti}_3\text{C}_2\text{T}_x$  film with high electrical conductivity was prepared from the exfoliated  $\text{Ti}_3\text{C}_2\text{T}_x$  nanosheets through vacuum filtration. Thus the tightly packed and continuously connected  $\text{Ti}_3\text{C}_2\text{T}_x$  nanosheets would possess better electron transfer properties; (2) The electrical conductivity of the  $\text{Ti}_3\text{C}_2\text{T}_x$  powder is highly dependent on the particle sizes due to the particle-to-particle contact resistance, thus,  $\text{Ti}_3\text{C}_2\text{T}_x$  materials composed of small blocks would have a lower electrical conductivity compared to the large-sized  $\text{Ti}_3\text{C}_2\text{T}_x$ .  $\text{Ti}_3\text{C}_2\text{T}_x$  materials used in our report are composed of blocks with size of 1~3  $\mu\text{m}$ , thus it displays a lower electrical conductivity than some reported large-sized  $\text{Ti}_3\text{C}_2\text{T}_x$  materials (3~6  $\mu\text{m}$ ,  $\sim 2500 \text{ S cm}^{-1}$ )<sup>16</sup>, and shows the same order of magnitude compared with the reported  $\text{Ti}_3\text{C}_2\text{T}_x$  materials with similar size ( $123 \text{ S cm}^{-1}$  and  $778 \text{ S cm}^{-1}$ )<sup>16-17</sup>.

The MDC material is anisotropic and exhibits good in-sheet conductivity. However, the electrical conductivity in the *c*-direction is relatively low due to the relatively long distance between the two adjacent nanosheets. Although the OMC is not highly conductive, it bridges the adjacent nanosheets in the MDC, and promotes the electron transportation in the *c*-direction. Thus, compared to the pure MDC, the MDC-OMC has a 3D cross-linked conductive networks and increased electrical conductivity. Similar observations were also published for other 2D material/OMC composites. For example, graphene oxide(GO)-resol derived rGO-porous carbon has a higher conductivity of  $41.9 \text{ S cm}^{-1}$  than the individual rGO ( $10\sim 20 \text{ S cm}^{-1}$ ) and resol derived porous carbon ( $0.41 \text{ S cm}^{-1}$ )<sup>9</sup>. The expanded graphite/OMC composite also shows lower resistance of  $0.3638 \Omega$  than the separated expanded graphite ( $0.4785 \Omega$ ) and OMC ( $0.4908 \Omega$ )<sup>18</sup>.

#### **Supplementary Note 4. Detailed discussion on density of MDC and MDC-OMC electrode.**

The MDC material has a layered structure with abundant in-plane and interlayer micropores. After rolling into the electrode film, the flake-to-flake restacking may lead to a little reduction in interlayer nanospace but the abundant in-plane micropores are still present. Therefore, the density of MDC electrode film is only about  $0.52 \text{ g cm}^{-3}$ .

The OMC material is formed in situ and is confined within the MDC interlayers, acting as rigid porous pillars and bridging the nanosheets. It has little influence on the interlayer of the MDC materials. In addition, the density of the OMC is higher than that of the MDC. As a result, the OMC would not only prevent the restacking of the layered nanosheets but also construct a more compact structure than in the MDC during the preparation of the electrode and electrochemical measurement. Thus, the MDC-OMC has a higher density of  $0.83 \text{ g cm}^{-3}$  than the pure MDC ( $0.52 \text{ g cm}^{-3}$ ).

The commercial activated carbon has a looser and more porous structure than the MDC-OMC due to the larger surface area (usually  $>1600 \text{ m}^2 \text{ g}^{-1}$ ). In addition, the morphology of the MDC-OMC blocks is different from the commercial activated carbon, which also would have influence on the packing density.

## Supplementary References

- 1 Simon, P. & Gogotsi, Y. Capacitive energy storage in nanostructured carbon–electrolyte systems. *Accounts of Chemical Research* **46**, 1094-1103 (2012).
- 2 Kang, D. M., Liu, M. L., Gu, J. J., Su, Y. S., Zhang, W. & Zhang, D. ‘Egg-box’-assisted fabrication of porous carbon with small mesopores for high-rate electric double layer capacitors. *ACS Nano* **9**, 11225-11233 (2015).
- 3 Pachfule, P., Shinde, D., Majumder, M. & Xu, Q. Fabrication of carbon nanorods and graphene nanoribbons from a metal–organic framework. *Nature Chemistry* **8**, 718-724 (2016).
- 4 Zheng, X. Y., Lv, W., Tao, Y., Shao, J. J., Zhang, C., Liu, D. H., Luo, J. Y., Wang, D. W. & Yang, Q. H. Oriented and interlinked porous carbon nanosheets with an extraordinary capacitive performance. *Chemistry of Materials* **26**, 6896-6903 (2014).
- 5 Laušević, Z., Apel, P. Y., Krstić, J. B. & Blonskaya, I. V. Porous carbon thin films for electrochemical capacitors. *Carbon* **64**, 456-463 (2013).
- 6 Lei, Z., Lu, L. & Zhao, X. The electrocapacitive properties of graphene oxide reduced by urea. *Energy & Environmental Science* **5**, 6391-6399 (2012).
- 7 Yang, X., Cheng, C., Wang, Y., Qiu, L. & Li, D. Liquid-mediated dense integration of graphene materials for compact capacitive energy storage. *Science* **341**, 534-537 (2013).
- 8 Jiang, L., Sheng, L., Long, C. & Fan, Z. Densely packed graphene nanomesh-carbon nanotube hybrid film for ultra-high volumetric performance supercapacitors. *Nano Energy* **11**, 471-480 (2015).
- 9 Liu, R. L., Wan, L., Liu, S. Q., Pan L. X.; Wu, D. Q. & Zhao, D. Y. An interface-induced co-assembly approach towards ordered mesoporous carbon/graphene aerogel for high-performance supercapacitors. *Advanced Functional Materials* **25**, 526-533 (2015).
- 10 Byon, H. R., Lee, S. W., Chen, S., Hammond, P. T. & Shao-Horn, Y. Thin films of carbon nanotubes and chemically reduced graphenes for electrochemical micro-capacitors. *Carbon*

- 49**, 457-467 (2011).
- 11 Sun, Y. *et al.* Highly conductive and flexible mesoporous graphitic films prepared by graphitizing the composites of graphene oxide and nanodiamond. *Journal of Materials Chemistry* **21**, 7154-7160 (2011).
  - 12 Chmiola, J., Largeot, C., Taberna, P. -L., Simon, P. & Gogotsi, Y. Monolithic carbide-derived carbon films for micro-supercapacitors. *Science* **328**, 480-483 (2010).
  - 13 Gao, P. C., Tsai, W. -Y., Daffos, B., Taberna, P. -L., Pérezd, C. R., Gogotsi, Y., Simon, P. & Favier, F. Graphene-like carbide derived carbon for high-power supercapacitors. *Nano Energy* **12**, 197-206 (2015).
  - 14 Ding, B., Wang, J., Wang, Y., Chang, Z., Pang, G., Dou, H. & Zhang, X. G. A two-step etching route to ultrathin carbon nanosheets for high performance electrical double layer capacitors. *Nanoscale* **8**, 11136-11142 (2016).
  - 15 Ling, Z. *et al.* Flexible and conductive MXene films and nanocomposites with high capacitance. *Proceedings of the National Academy of Sciences* **111**, 16676-16681 (2014).
  - 16 Peng, Y. Y. *et al.* All-MXene (2D titanium carbide) solid-state microsupercapacitors for on-chip energy storage. *Energy & Environmental Science* **9**, 2847-2854 (2016).
  - 17 Zhao, M. Q. *et al.* Flexible MXene/carbon nanotube composite paper with high volumetric capacitance. *Advanced Materials* **27**, 339-345 (2014).
  - 18 Wang, L. *et al.* In situ intercalating expandable graphite for mesoporous carbon/graphite nanosheet composites as high-performance supercapacitor electrodes. *ChemSusChem* **5**, 2442-2450 (2012).
